# Supplementary material for: Building an artificial solid electrolyte interphase with high-uniformity and fast ion diffusion for ultralong-life sodium metal anodes
Source: Royal Society of Chemistry journal article supplement (doi:10.1039/d0ta04715e), 2020-01-01
Supplement: d0ta04715e1.pdf [file d0ta04715e1.pdf]

## Electronic Supplementary Information

# Building Artificial Solid Electrolyte Interphase with High-Uniformity and Fast Ion Diffusion for Ultralong-Life Sodium Metal Anodes

Qianwen Chen,<sup>‡a</sup> Heng He,<sup>‡ab</sup> Zhen Hou,<sup>a</sup> Weiman Zhuang,<sup>a</sup> Tianxu Zhang,<sup>a</sup> Zongzhao Sun<sup>ab</sup> and Limin Huang<sup>\*ac</sup>

<sup>a</sup>*Department of Chemistry, Southern University of Science and Technology (SUSTech), Shenzhen, Guangdong 518055, China*

<sup>b</sup>*School of Chemistry and Chemical Engineering, Harbin Institute of Technology, Harbin 150001, China*

<sup>c</sup>*Guangdong Provincial Key Laboratory of Energy Materials for Electric Power, Southern University of Science and Technology, Shenzhen, Guangdong 518055, China*

<sup>‡</sup> Both authors have equal contribution.

\*E-mail: huanglm@sustech.edu.cn

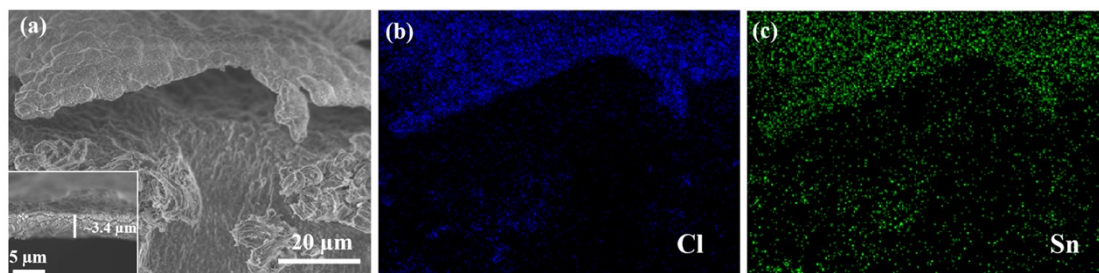

**Fig. S1** Cross-sectional SEM image of the SnCl<sub>4</sub>-Na electrode before cycling and the corresponding EDS elemental mapping of (b) Cl and (c) Sn.

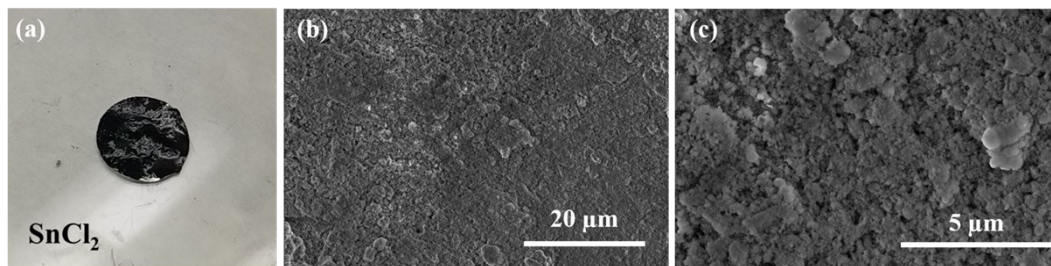

**Fig. S2** Optical photo of (a)  $\text{SnCl}_2$ -Na electrode before cycling. (b, c) SEM images of the  $\text{SnCl}_2$ -Na electrode before cycling.

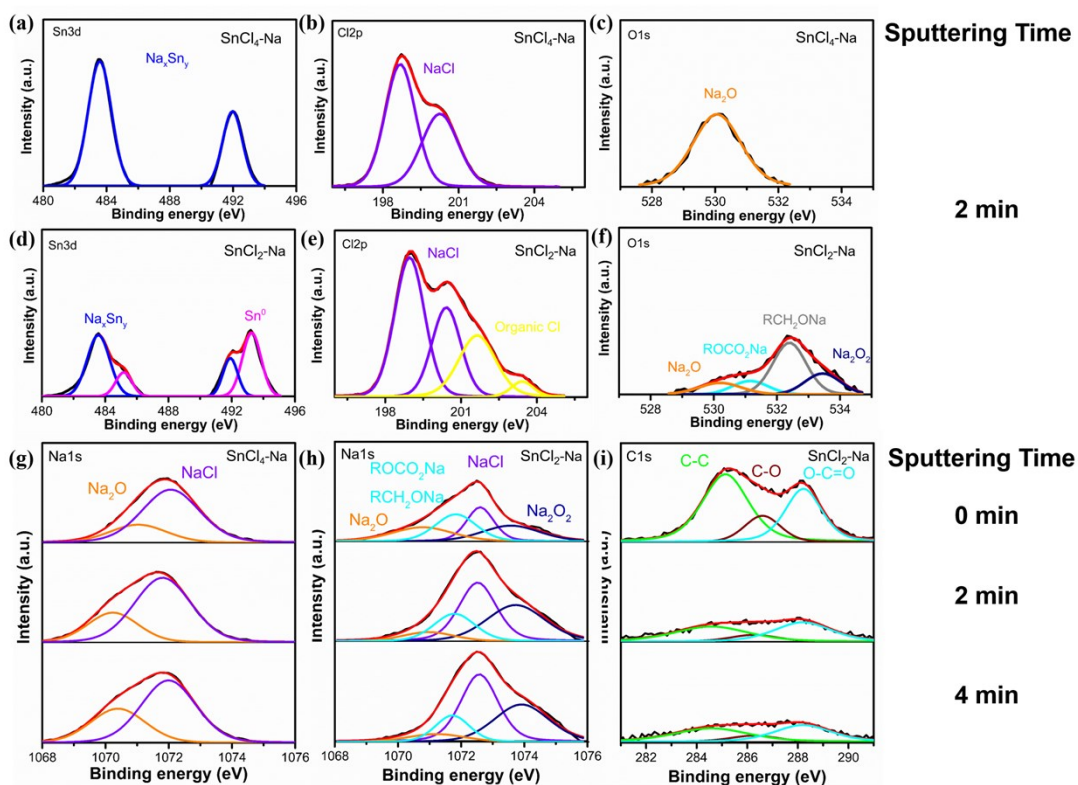

**Fig. S3.** (a) Sn 3d, (b) Cl 2p and (c) O 1s XPS spectra of the SnCl<sub>4</sub>-Na electrode after 2 min Ar cluster ion sputtering. (d) Sn 3d, (e) Cl 2p and (f) O 1s XPS spectra of the SnCl<sub>2</sub>-Na electrodes after 2 min Ar sputtering. (g) XPS Na 1s spectra of SnCl<sub>4</sub>-Na electrodes before cycling. (h) Na 1s and (i) C 1s XPS spectra of SnCl<sub>2</sub>-Na electrode before cycling. (sputtering times are shown in the columns).

The Na 1s spectra of SnCl<sub>4</sub>-Na electrode at ~1072.1 eV and ~1070.6 eV are assigned to NaCl and Na<sub>2</sub>O.<sup>1,2</sup> For SnCl<sub>2</sub>-Na electrode, the Na 1s spectra are deconvoluted into four peaks at ~1070.9 eV (Na<sub>2</sub>O), ~1073.7 eV (Na<sub>2</sub>O<sub>2</sub>), ~1072.5 eV (NaCl) and ~1071.7 eV (RCH<sub>2</sub>ONa and ROCO<sub>2</sub>Na),<sup>3,4</sup> and peaks at ~284.8 eV, ~286.5 eV and ~288.2 eV in C 1s spectra belong to C-C, C-O and O-C=O.<sup>2</sup>

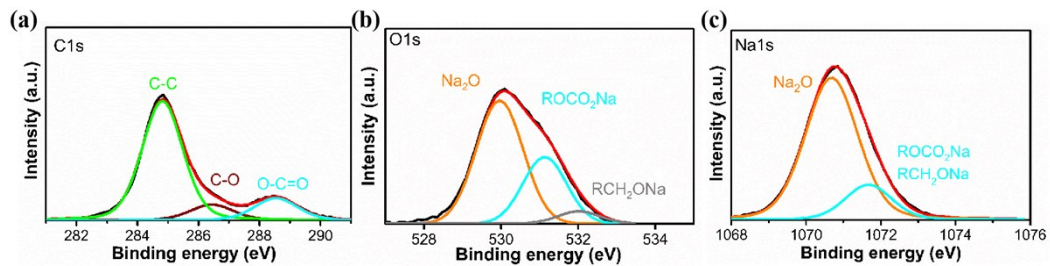

**Fig. S4** (a) C 1s, (b) O 1s and (c) Na 1s XPS spectra of the DGM-Na electrode.

The XPS spectra of DGM modified Na metal electrode (DGM-Na electrode) are collected in Fig. S4. In O 1s spectra, the reaction between Na and DGM results in the formation of ROCO<sub>2</sub>Na (531.1 eV), RCH<sub>2</sub>ONa (532.0 eV) and Na<sub>2</sub>O (530.0 eV). These constituents (ROCO<sub>2</sub>Na and RCH<sub>2</sub>ONa) are similar to the organic species of SEI layer on the SnCl<sub>2</sub>-Na electrode, demonstrating that the formed artificial protection layer on SnCl<sub>2</sub>-Na electrode surface is attributed to the heterogeneous reaction among Na metal, SnCl<sub>2</sub> and DGM solvent.

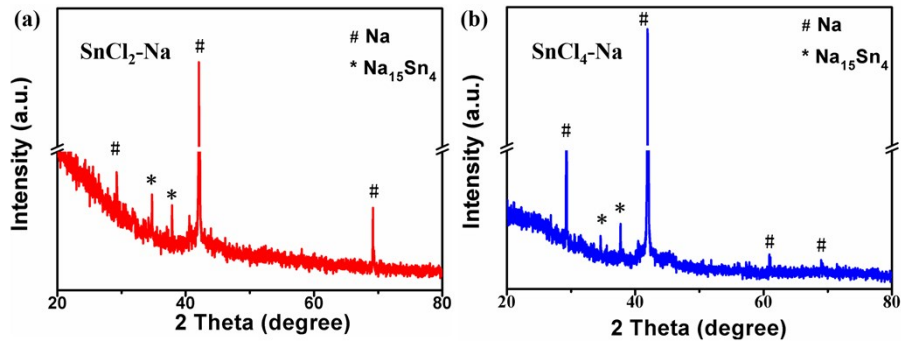

**Fig. S5** XRD patterns of (a) SnCl<sub>2</sub>-Na and (b) SnCl<sub>4</sub>-Na electrodes.

As shown in Fig. S5, the SnCl<sub>2</sub>-Na and SnCl<sub>4</sub>-Na electrodes exhibit characteristic diffraction peaks at 34.8° and 37.5° corresponding to the (511) and (521) facets of the Na<sub>15</sub>Sn<sub>4</sub> alloy (PDF #31-1327).

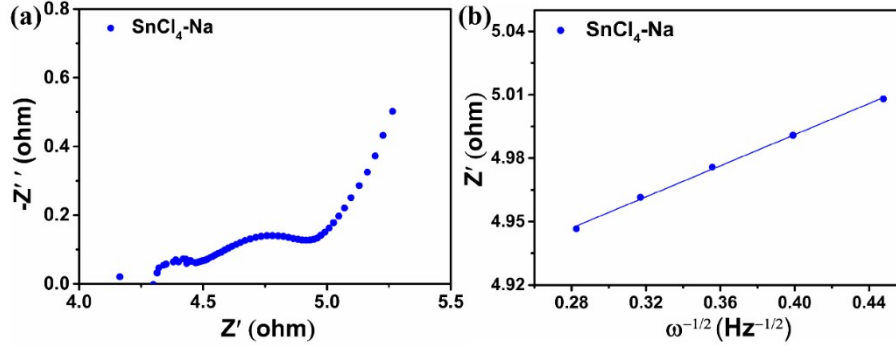

**Fig. S6** (a) Nyquist plots of the SnCl<sub>4</sub>-Na electrode before cycling. (b) Relationship between  $Z'$  with  $\omega^{-1/2}$  in the low-frequency region for the SnCl<sub>4</sub>-Na electrode.

The Na<sup>+</sup> ion diffusion coefficients of inorganics (Na-Sn alloy and NaCl) can be obtained from the oblique lines in the low-frequency regions of the Nyquist plots according to the following Eq. 1 and 2:

$$Z' = R_s + R_{ct} + \sigma \omega^{-1/2} \quad (\text{Eq. 1})$$

$$D = R^2 T^2 / (2 C^2 F^4 S^2 \sigma^2) \quad (\text{Eq. 2})$$

where the  $Z'$  is the real part of impedance,  $R_s$  is the Ohm resistance,  $R_{ct}$  is the charge transfer resistance,  $\sigma$  is the Warburg factor,  $\omega$  the angular frequency,  $D$  is the Na<sup>+</sup> ion diffusion coefficient,  $R$  is the gas constant,  $T$  is the absolute temperature,  $C$  is the molar concentration of Na<sup>+</sup> ions in the electrolyte,  $F$  is the Faraday's constant, and  $S$  is the surface area of the electrodes. As shown in Fig. S6b, the  $Z'$  has a linear relationship with  $\omega^{-1/2}$  and  $\sigma$  is determined by the slope of the lines, and thus  $D$  could be obtained ( $1.1 \times 10^{-7} \text{ cm}^2 \text{ s}^{-1}$ ).

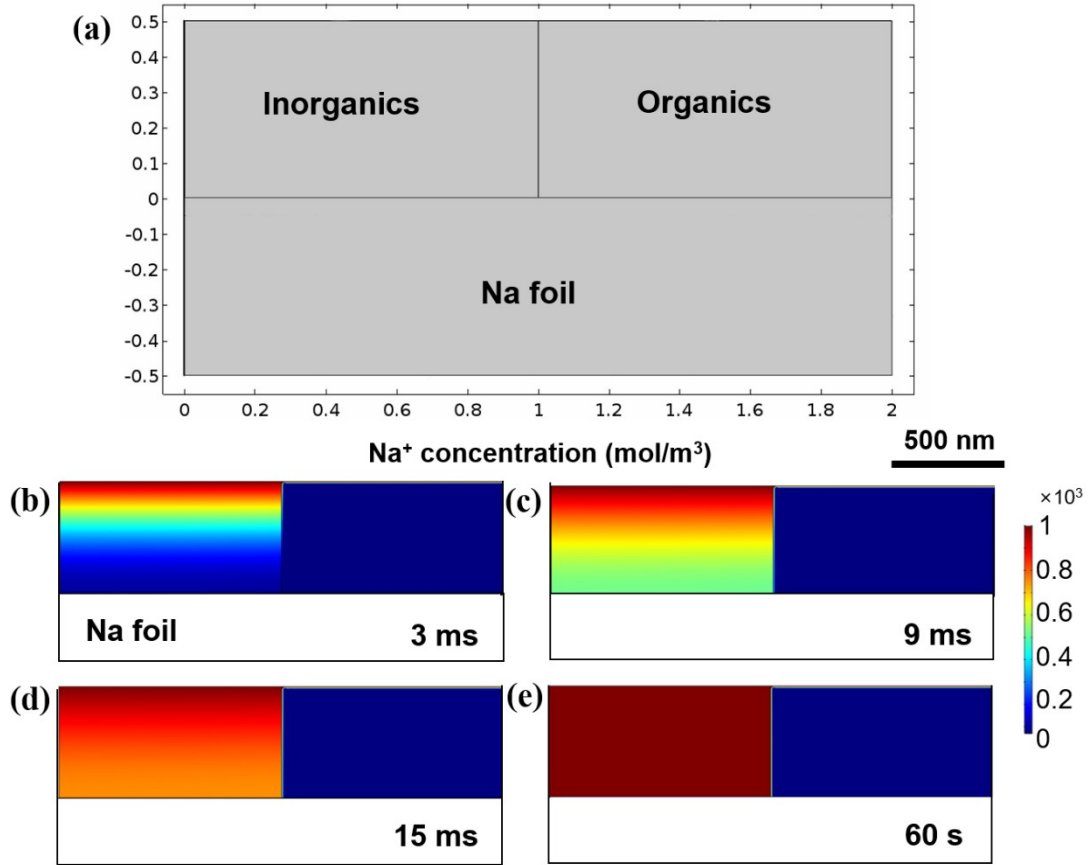

**Fig. S7** (a) Simulation of bi-component SEI layer with different diffusion coefficient in COMSOL. (b-e) Simulation of Na<sup>+</sup> concentration in different SEI layer components at different time. Scale bar: 500 nm.

Simulation of different SEI layer components model with thickness 0.5  $\mu\text{m}$  are shown in the in Fig. S7a, and the lengths of inorganics (Na-Sn alloy and NaCl) and organics (ROCO<sub>2</sub>Na and RCH<sub>2</sub>ONa) are all designed to be 1  $\mu\text{m}$ . The boundary conditions between inorganic and organic blocks are defined continuous boundary condition, in which the concentration at the interface satisfies the following equation:  $c_{\text{Na}^+}^+ = c_{\text{Na}^+}^-$  (+ and - represent the left and right of the boundary).

The Na<sup>+</sup> concentration in the different protective layer components can be calculated using Fick's law. To simplify the simulation complexity, the convective mass transport and electro-chemical polarization are ignored.

$$\frac{\partial c}{\partial t} = \nabla \cdot (D_i \nabla c) \quad (\text{Eq. 3})$$



where  $c$  is  $\text{Na}^+$  concentration, and  $D_i$  is the  $\text{Na}^+$  ion diffusion coefficient in different components.

According to the previous reports<sup>5</sup>, the conductivities of organics (Na alkyl carbonates) is  $\sim 2 \times 10^{-12} \text{ S cm}^{-1}$ . In addition, the conductivity for all Na alkyl carbonates are identical regardless of chain length at  $20^\circ\text{C}$ . Using following Eq. 4 and 5, a diffusion coefficient of organics ( $5.2 \times 10^{-16} \text{ cm}^2 \text{ s}^{-1}$ ) is obtained.

$$\sigma = \mu n e \quad (\text{Eq. 4})$$

$$D = \mu k_b T q^{-1} \quad (\text{Eq. 5})$$

where the  $\sigma$  is the  $\text{Na}^+$  ion conductivity,  $\mu$  is the  $\text{Na}^+$  ion mobility,  $n$  is the number density of electrons,  $e$  is the charge of an electron,  $D$  is the  $\text{Na}^+$  ion diffusion coefficient,  $k_b$  is the Boltzmann constant,  $T$  is the absolute temperature,  $q$  is the charge of  $\text{Na}^+$  ion.

In short, the diffusion coefficients of  $\text{Na}^+$  in the organics and inorganics are  $5.2 \times 10^{-16} \text{ cm}^2 \text{ s}^{-1}$  and  $1.1 \times 10^{-7} \text{ cm}^2 \text{ s}^{-1}$ , respectively.

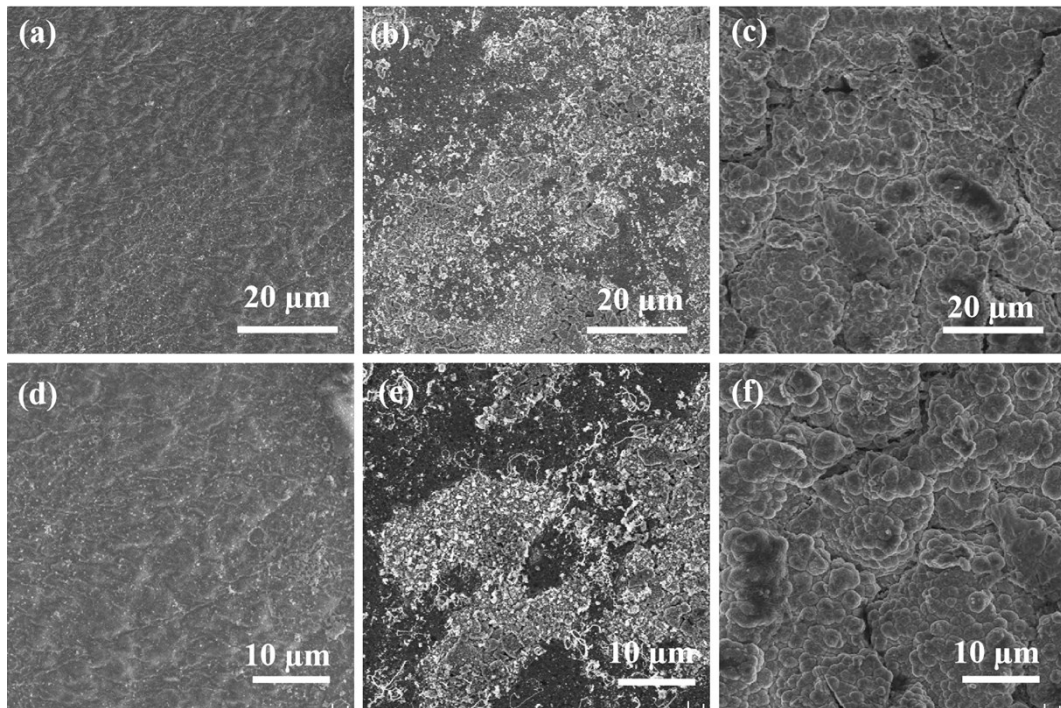

**Fig. S8** SEM images of (a, d) the Na, (b, e) SnCl<sub>2</sub>-Na and (c, f) SnCl<sub>4</sub>-Na electrodes after 100 cycles at 2 mA cm<sup>-2</sup> with a cycling capacity of 1 mAh cm<sup>-2</sup>.

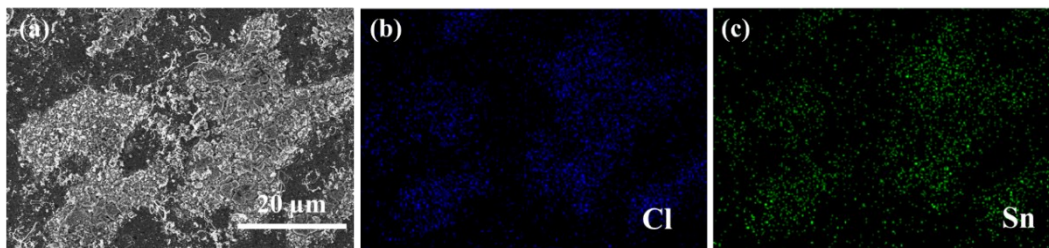

**Fig. S9** (a) SEM images of the  $\text{SnCl}_2\text{-Na}$  electrode after 100 cycles at  $2 \text{ mA cm}^{-2}$  with a cycling capacity of  $1 \text{ mAh cm}^{-2}$ , and the corresponding EDX elemental mappings of (b) Cl and (c) Sn.

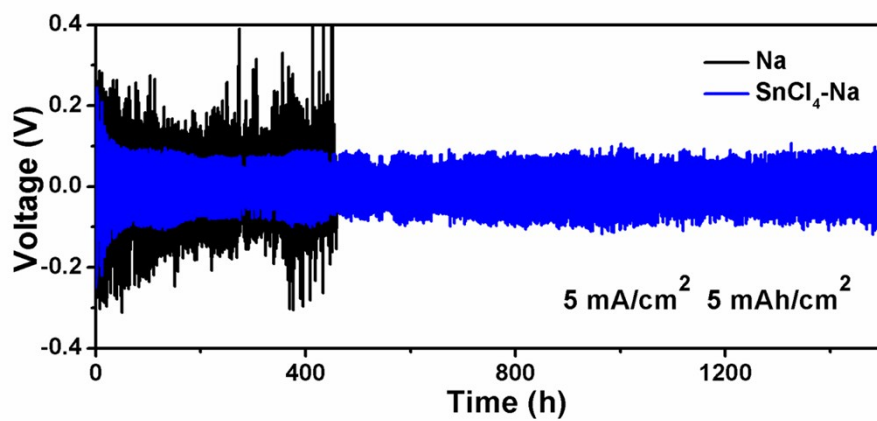

**Fig. S10** Cycling performance of the symmetric cells with the Na and SnCl<sub>4</sub>-Na electrodes with cycling capacities of 5 mAh cm<sup>-2</sup> at 5 mA cm<sup>-2</sup>.

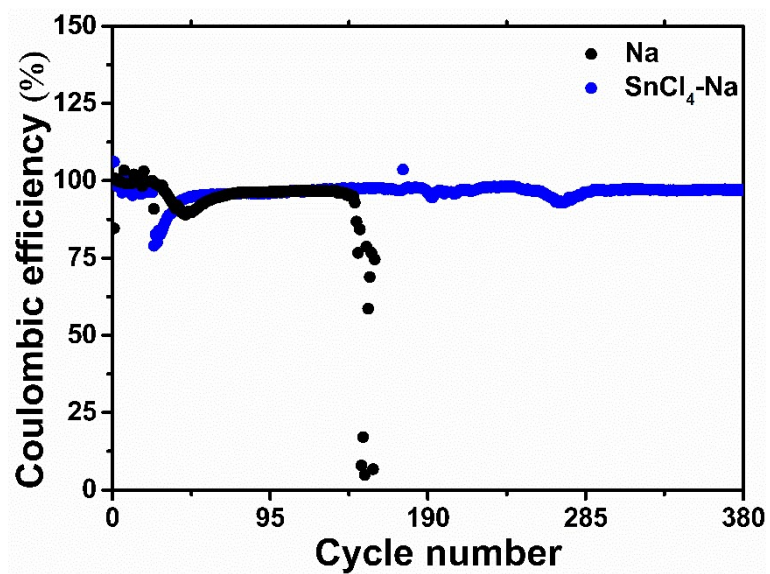

**Fig. S11** Coulombic efficiency of Na-FeS<sub>2</sub> full cells using Na and SnCl<sub>4</sub>-Na as anodes and FeS<sub>2</sub> as cathodes at 0.2, 0.5, 1, 2 and 0.2 A g<sup>-1</sup>.

**Table S1.** Summary of cycle performance of Na plating/stripping behaviors. (The electrolyte concentration is 1M)

| Materials                                               | Capacity (mAh/cm <sup>2</sup> ) | Current density (mA/cm <sup>2</sup> ) | Cycles      | Time (h)    | Electrolyte                                  | Refs             |
|---------------------------------------------------------|---------------------------------|---------------------------------------|-------------|-------------|----------------------------------------------|------------------|
| Na-Sn alloy/Na <sub>2</sub> O                           | 1                               | 1                                     | 350         | 700         | NaCF <sub>3</sub> SO <sub>3</sub> in diglyme | 6                |
|                                                         |                                 | 2                                     | 500         | 500         |                                              |                  |
| Na/NSCNT                                                | 1                               | 1                                     | 250         | 500         | NaSO <sub>3</sub> CF <sub>3</sub> in diglyme | 7                |
| PhS <sub>2</sub> Na <sub>2</sub> -rich protection layer | 1                               | 1                                     | 400         | 800         | NaPF <sub>6</sub> in EC/PC                   | 8                |
|                                                         |                                 | 5                                     | 700         | 280         |                                              |                  |
| CNT/Na                                                  | 1                               | 0.5                                   | 200         | 800         | NaClO <sub>4</sub> in EC/PC                  | 9                |
| MOF/Cu                                                  | 1                               | 1                                     | 300         | 600         | NaClO <sub>4</sub> in EC/DMC                 | 10               |
| Zn <sub>5</sub> A-N-C                                   | 1                               | 1                                     | 150         | 300         | NaClO <sub>4</sub> in EC/DMC                 | 11               |
| Carbon felt                                             | 1                               | 1                                     | 550         | 1100        | NaPF <sub>6</sub> in diglyme                 | 12               |
|                                                         |                                 | 2                                     | 350         | 350         |                                              |                  |
| NaAsF <sub>6</sub> additive                             | 1                               | 0.5                                   | 87          | 350         | NaTFSI in FEC                                | 13               |
|                                                         | 0.5                             | 0.25                                  | 137         | 550         |                                              |                  |
| Na/CNF                                                  | 1                               | 1                                     | 1000        | 2000        | NaPF <sub>6</sub> in diglyme                 | 14               |
| SbF <sub>3</sub> additive                               | 0.5                             | 0.5                                   | 500         | 1000        | NaFSI in DME                                 | 15               |
| NaI SEI                                                 | 0.75                            | 0.25                                  | 83          | 500         | NaCF <sub>3</sub> SO <sub>3</sub> in diglyme | 16               |
| NaPS layers                                             | 1                               | 1                                     | 135         | 270         | NaPF <sub>6</sub> in EC/PC                   | 17               |
|                                                         | 3                               |                                       | 41          | 250         |                                              |                  |
| Sn-Na alloy                                             | 1                               | 0.25                                  | 125         | 1000        | NaPF <sub>6</sub> in EC/PC                   | 18               |
| NaBr interphase                                         | 0.25                            | 0.5                                   | 250         | 250         | NaPF <sub>6</sub> in EC/PC                   | 19               |
| Al <sub>2</sub> O <sub>3</sub> -PVDF-HFP coating        | 1                               | 0.5                                   | 100         | 400         | NaClO <sub>4</sub> in EC/PC                  | 20               |
| SnCl <sub>4</sub> -Na electrode                         | <b>1</b>                        | <b>2</b>                              | <b>4500</b> | <b>4500</b> | <b>NaPF<sub>6</sub> in diglyme</b>           | <b>This work</b> |
|                                                         | <b>3</b>                        |                                       | <b>1333</b> | <b>4000</b> |                                              |                  |
|                                                         | <b>5</b>                        |                                       | <b>600</b>  | <b>3000</b> |                                              |                  |
|                                                         | <b>1</b>                        | <b>5</b>                              | <b>7000</b> | <b>2800</b> |                                              |                  |
|                                                         | <b>5</b>                        |                                       | <b>750</b>  | <b>1500</b> |                                              |                  |

## Reference

1. Z. W. Seh, J. Sun, Y. Sun and Y. Cui, *ACS Cent. Sci.*, 2015, **1**, 449-455.
2. X. Zheng, H. Fu, C. Hu, H. Xu, Y. Huang, J. Wen, H. Sun, W. Luo and Y. Huang, *J. Phys. Chem. Lett.*, 2019, **10**, 707-714.
3. K. Li, J. Zhang, D. Lin, D. W. Wang, B. Li, W. Lv, S. Sun, Y. B. He, F. Kang, Q. H. Yang, L. Zhou and T. Y. Zhang, *Nat. Commun.*, 2019, **10**, 725.
4. L. L. Marciniuk, P. Hammer, H. O. Pastore, U. Schuchardt and D. Cardoso, *Fuel*, 2014, **118**, 48-54.
5. L. Schafzahl, H. Ehmman, M. Kriechbaum, J. Sattelkow, T. Ganner, H. Plank, M. Wilkening and S. A. Freunberger, *Chem. Mater.*, 2018, **30**, 3338-3345.
6. X. Zheng, W. Yang, Z. Wang, L. Huang, S. Geng, J. Wen, W. Luo and Y. Huang, *Nano Energy*, 2020, **69**, 104387.
7. B. Sun, P. Li, J. Zhang, D. Wang, P. Munroe, C. Wang, P. H. L. Notten and G. Wang, *Adv. Mater.*, 2018, **30**, 1801334.
8. M. Zhu, G. Wang, X. Liu, B. Guo, G. Xu, Z. Huang, M. Wu, H. K. Liu, S. X. Dou and C. Wu, *Angew. Chem. Int. Ed.*, 2020, **59**, 6596-6600.
9. Y.-J. Kim, J. Lee, S. Yuk, H. Noh, H. Chu, H. Kwack, S. Kim, M.-H. Ryou and H.-T. Kim, *J. Power Sources*, 2019, **438**, 227005.
10. J. Qian, Y. Li, M. Zhang, R. Luo, F. Wang, Y. Ye, Y. Xing, W. Li, W. Qu, L. Wang, L. Li, Y. Li, F. Wu and R. Chen, *Nano Energy*, 2019, **60**, 866-874.
11. T. Yang, T. Qian, Y. Sun, J. Zhong, F. Rosei and C. Yan, *Nano Lett.*, 2019, **19**, 7827-7835.
12. J. Zhang, W. Wang, R. Shi, W. Wang, S. Wang, F. Kang and B. Li, *Carbon*, 2019, **155**, 50-55.
13. S. Wang, W. Cai, Z. Sun, F. Huang, Y. Jie, Y. Liu, Y. Chen, B. Peng, R. Cao, G. Zhang and S. Jiao, *Chem. Commun.*, 2019, **55**, 14375-14378.
14. J. Sun, M. Zhang, P. Ju, Y. Hu, X. Chen, W. Wang and C. Chen, *Energy Technology*, 2020, **8**, 1901250.
15. W. Fang, H. Jiang, Y. Zheng, H. Zheng, X. Liang, Y. Sun, C. Chen and H. Xiang, *J. Power Sources*, 2020, **455**, 227956.
16. H. Tian, H. Shao, Y. Chen, X. Fang, P. Xiong, B. Sun, P. H. L. Notten and G. Wang, *Nano Energy*, 2019, **57**, 692-702.
17. Y. Zhao, J. Liang, Q. Sun, Lyudmila V. Goncharova, J. Wang, C. Wang, K. R. Adair, X. Li, F. Zhao, Y. Sun, R. Li and X. Sun, *J. Mater. Chem. A*, 2019, **7**, 4119-4125.
18. S. Choudhury, S. Wei, Y. Ozhaves, D. Gunceler, M. J. Zachman, Z. Tu, J. H. Shin, P. Nath, A. Agrawal, L. F. Kourkoutis, T. A. Arias and L. A. Archer, *Nat. Commun.*, 2017, **8**, 898.
19. Z. Tu, S. Choudhury, M. J. Zachman, S. Wei, K. Zhang, L. F. Kourkoutis and L. A. Archer, *Nat. Energy*, 2018, **3**, 310-316.
20. Y. J. Kim, H. Lee, H. Noh, J. Lee, S. Kim, M. H. Ryou, Y. M. Lee and H. T. Kim, *ACS Appl. Mater. Interfaces*, 2017, **9**, 6000-6006.
